# Supplementary material for: Three dimensional molybdenum oxide/polyaniline hybrid nanosheet networks with outstanding optical and electrochemical properties
Source: Royal Society of Chemistry journal article supplement (doi:10.1039/c7nj02151h), 2017-01-01
Supplement: c7nj02151h1.pdf [file c7nj02151h1.pdf]

## Electronic Supporting Information

### Three dimensional molybdenum oxide/polyaniline hybrid nanosheet networks with outstanding optical and electrochemical properties

Kun Zhang,<sup>a</sup> Yuemin Wang,<sup>b</sup> Xiaoxuan Ma,<sup>a</sup> Hangchuan Zhang,<sup>b</sup> Shuai Hou,<sup>b</sup>

Jiupeng Zhao,<sup>\*a</sup> Xingang Li,<sup>c</sup> Liangsheng Qiang<sup>a</sup> and Yao Li<sup>\*b</sup>

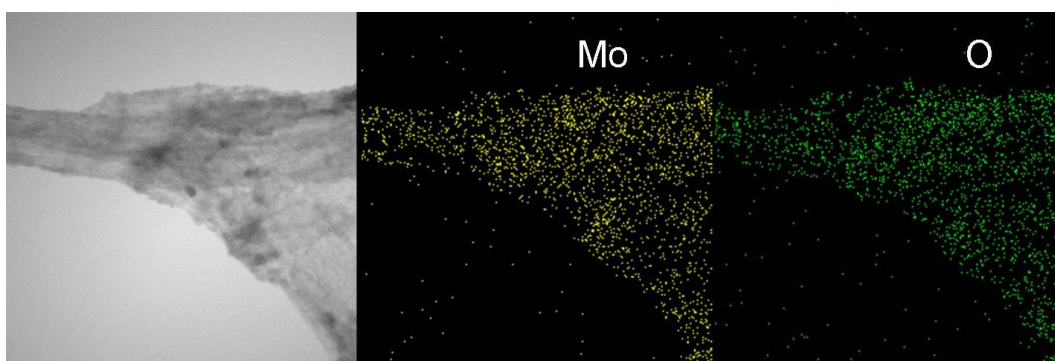

Fig. S1 TEM image of 3D MoO<sub>3</sub> nanosheet networks and corresponding EDS mappings.

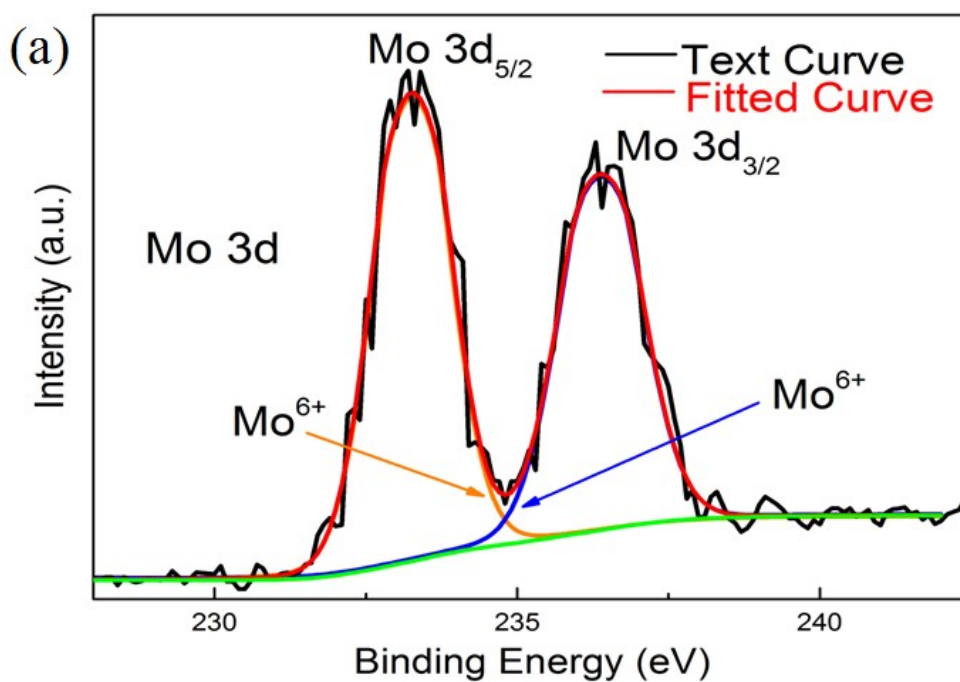

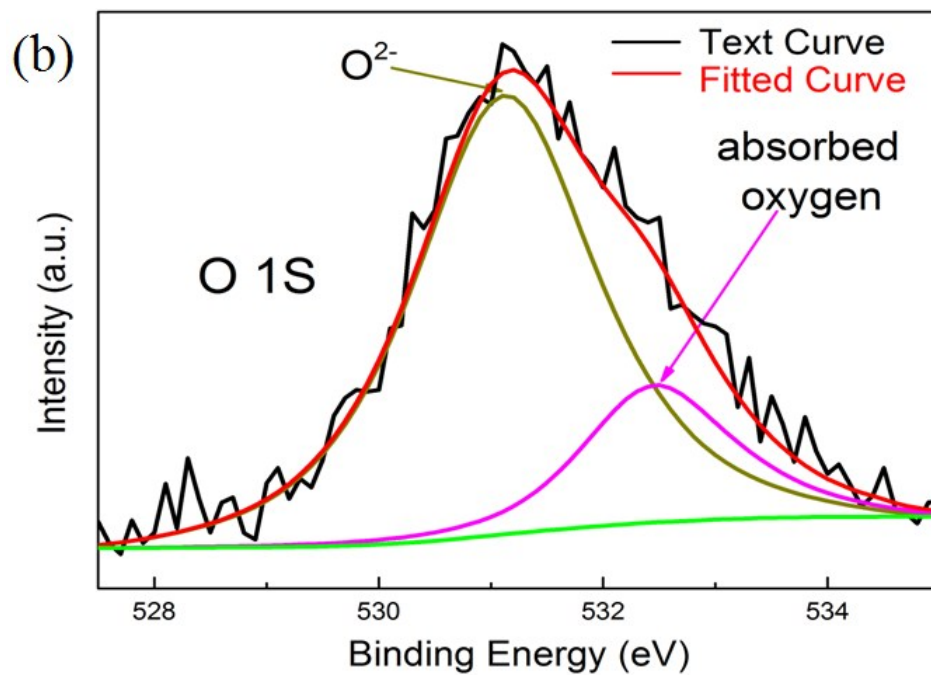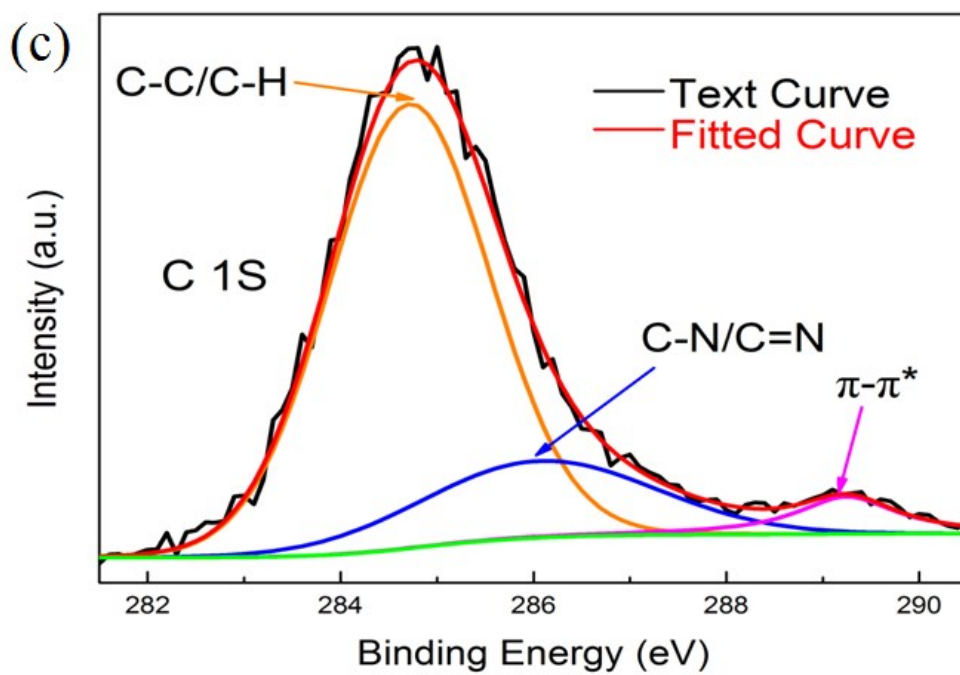

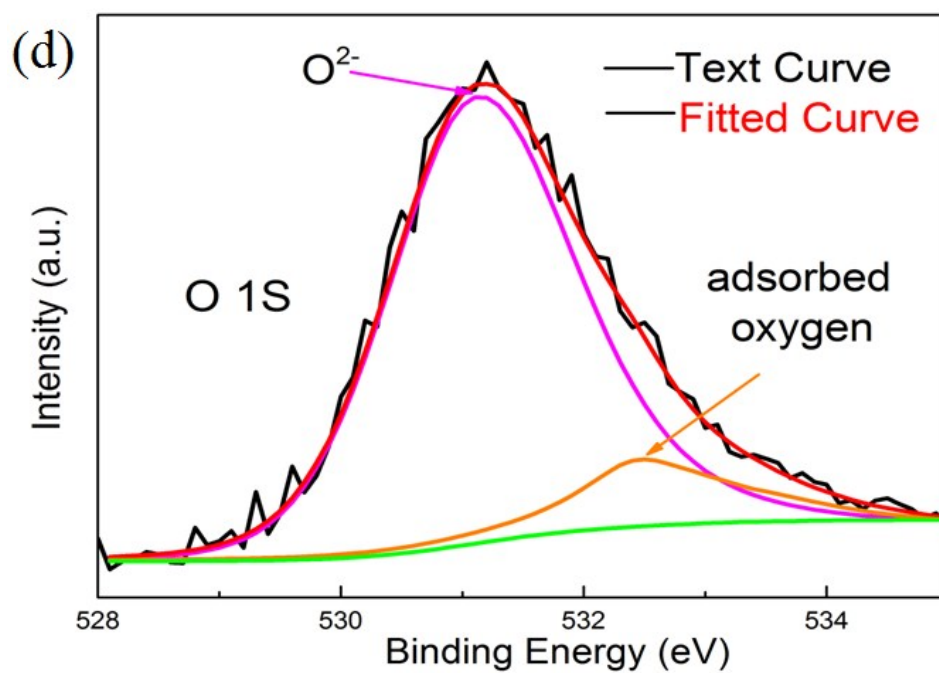

Fig. S2 (a) XPS Mo 3d spectrum of 3D MoO<sub>3</sub> nanosheet networks, (b) XPS O 1s spectrum of 3D MoO<sub>3</sub> nanosheet networks, (c) XPS C 1s spectrum of 3D MoO<sub>3</sub>/PANI hybrid nanosheet networks and (d) XPS O 1s spectrum of 3D MoO<sub>3</sub>/PANI hybrid nanosheet networks.

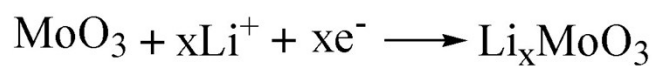

bleach

colour

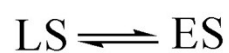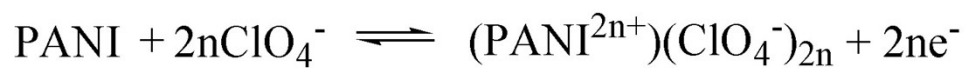

light yellow

green

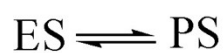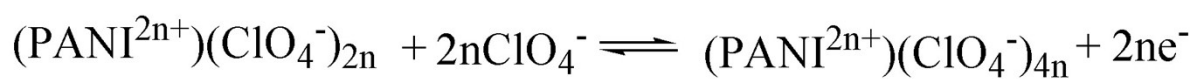

green

purple

Fig. S3 Illustration of the dual electrochromic mechanism of 3D MoO<sub>3</sub>/PANI hybrid nanosheet networks film.

Leucoemeraldine base

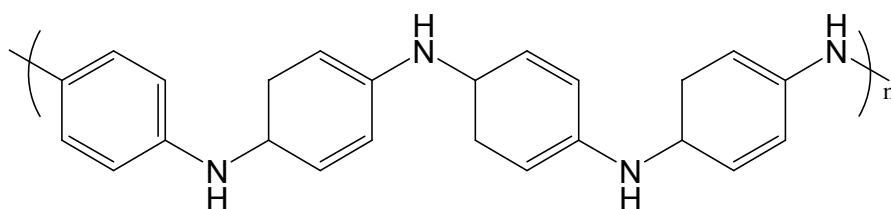

Emeraldine salt

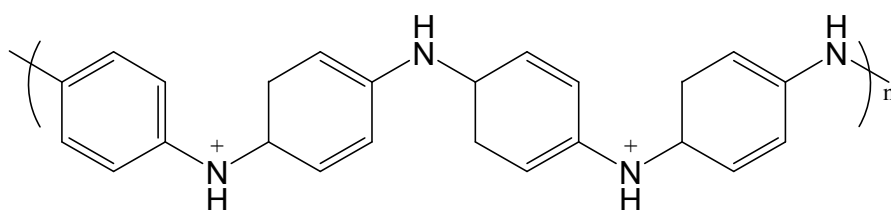

Emeraldine base

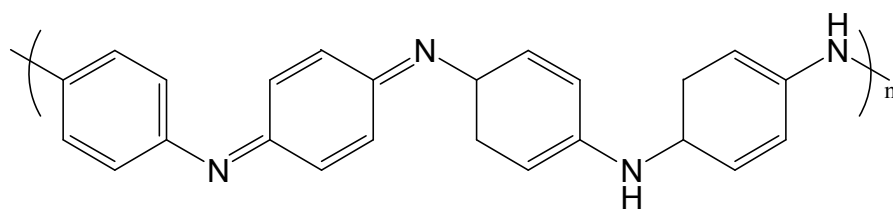

Pernigraniline salt

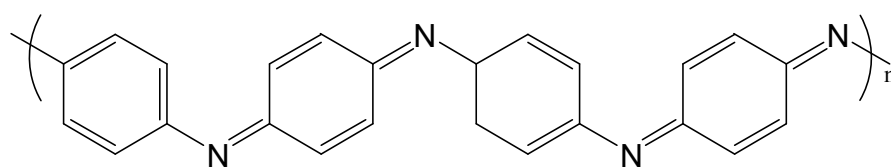

Fig. S4 The main molecular structures of LB, ES, EB, and PS.

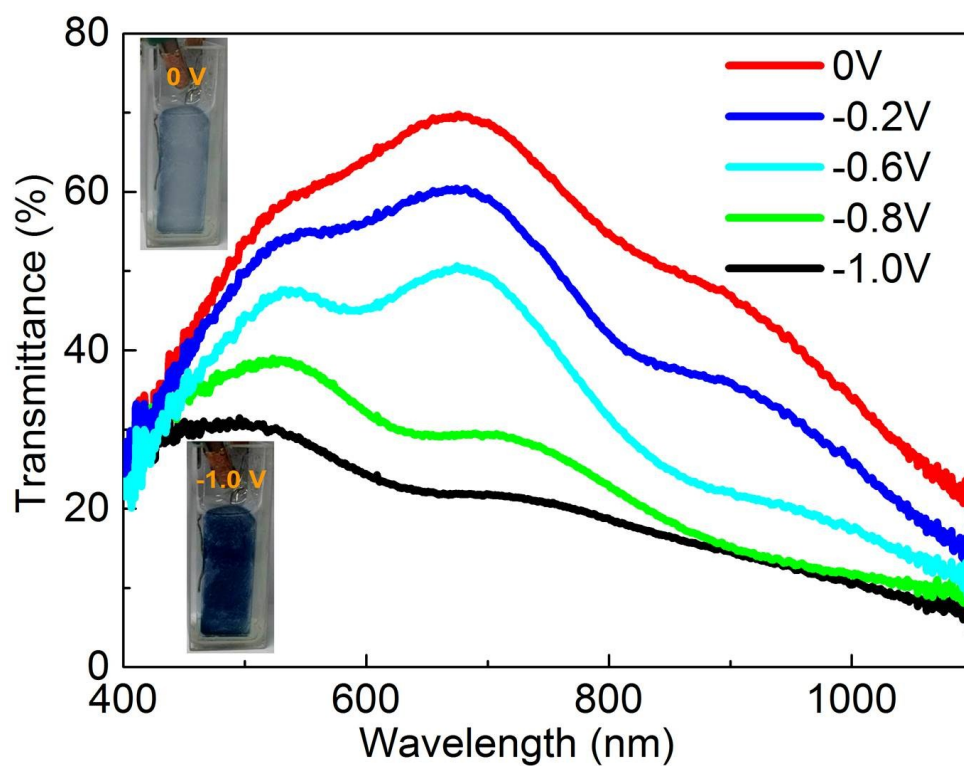

Fig. S5 Transmittance spectra for 3D MoO<sub>3</sub> nanosheet networks film under different voltages (inset of photos at 0 and -1.0 V).

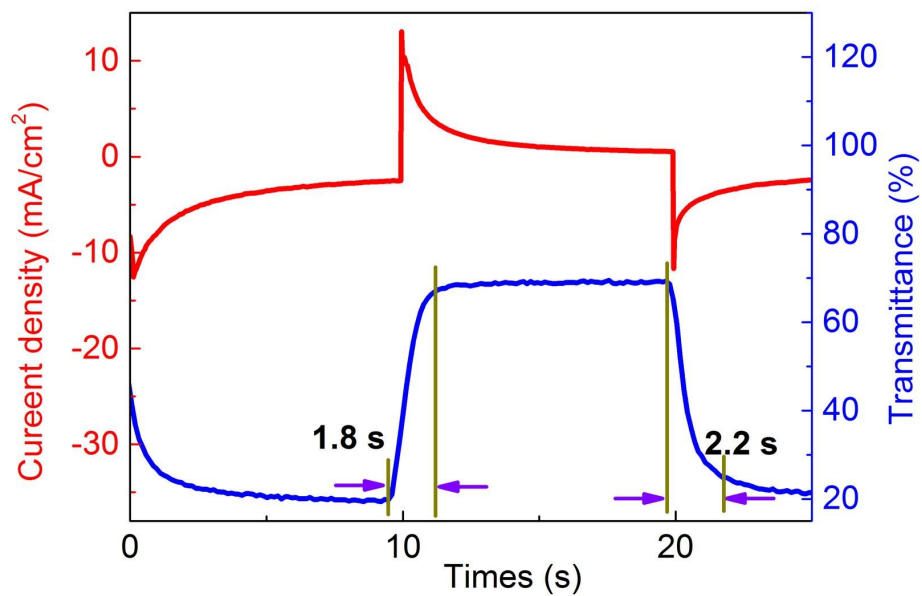

Fig. S6 Electrochromic response time of 3D MoO<sub>3</sub> nanosheet networks film at 671 nm by continuously stepping voltage between -0.6 and 0.2 V.

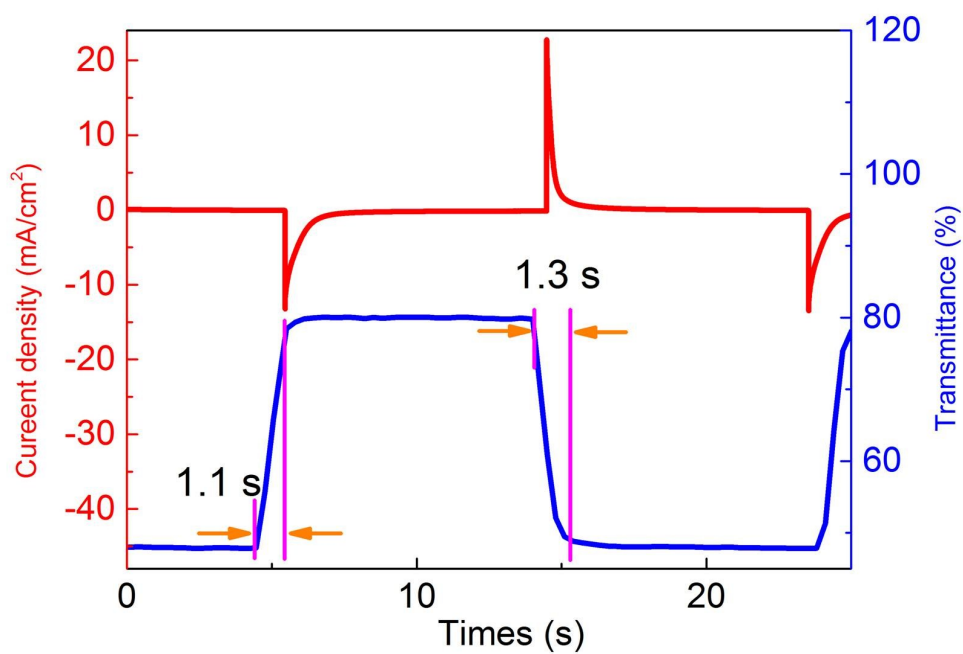

Fig. S7 Electrochromic response time of PANI film at 592 nm by continuously stepping voltage between -0.2 and 0.8 V.

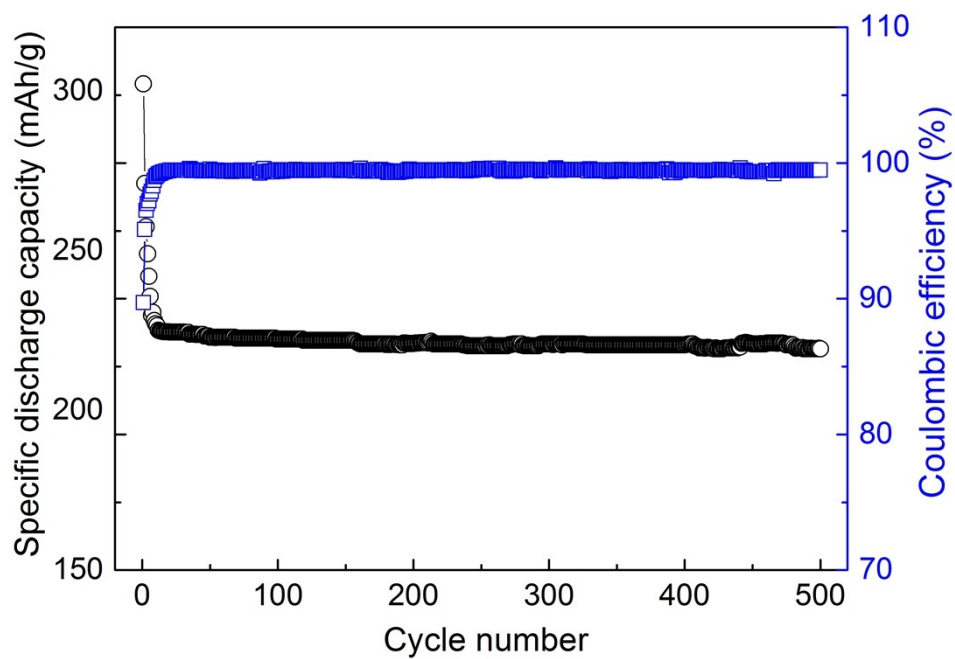

Fig. S8 The cycling performance and coulombic efficiency of 3D MoO<sub>3</sub>/PANI hybrid nanosheet networks film at a current density of 1 A g<sup>-1</sup>.
